# Supplementary material
Source: Springer Nature journal article supplement (http://www.springermedizin.de/resource/supplementary/12913_2009_1258_MOESM2_ESM.pdf/9527718)
Supplement: MOESM2 [file 9527718]

**Patient** contacts the GP for surgical disease.

**GP** refers the patient by ordinary routine (fax or e-mail) to surgical departments

### **Surgical Depts**

- evaluate the referral papers for urgency
- call in for diagnosing & intervention
- include information in letter to the patient

### **Surgical Depts**

- fill in the medical record incl. alcohol & smoking, support lifestyle intervention
- perform surgery, peri-op. care and follow-up for effect

**GP** (< 5 minutes):

- Identifies daily smoking & hazardous drinking
- Recommends preop. change in lifestyle
- Hands out the folder
- Refers the patient to the hospital programme using either fax, e-mail or telephone answering machine
- Registers the activity to get the 1/3 extra reimbursements

### **Hospital Tobacco cessation Clinic**

- Contacts the referred patients
- Obtains detailed history of lifestyle and addiction
- Gives motivational counselling / support
- Offers smoking cessation program over 6 weeks (20 min x 5), individual or in groups, free nicotine replacement therapy
- Refers harmful drinkers further to the Alcohol Unit

### **Hospital Alcohol Unit**

- Offers alcohol cessation programme over 4 weeks, individual, incl. free medication for withdrawal symptoms and supportive disulfiram treatment

### **Hospital Tobacco cessation Clinic**

- Coordinates the intervention with the date of operations in order to support the patient in maintaining the healthy lifestyle until the date of surgery in case of waiting list
- Follows-up the patient after surgery
- The intervention and long-term effect is monitored using the Danish clinical database for smoking intervention (routine for all smoking intervention in the Denmark)
